# Supplementary material for: Antioxidant Potential and Enhancement of Bioactive Metabolite Production in In Vitro Cultures of Scutellaria lateriflora L. by Biotechnological Methods
Source: MDPI journal article supplement (doi:10.3390/molecules27031140), 2022-02-08
Supplement: s1 [file s1]

**Table S1** Content of estimated metabolites in agitated microshoot in vitro cultures of *S. lateriflora* grown on LS medium supplemented with 1.0 mg/L BA and 1.0 NAA mg/L after administering different concentrations of biosynthetic precursors (phenylalanine and tyrosine) and elicitor (methyl jasmonate) collected 3 days after supplementation. Mean  $\pm$  SD [mg/100 g DW].

| Feeding/eliciting                                 |     | Baicalein            | Baicalin             | Wogonin              | Wogonoside           | Scutellarin         | Oroxylin A         | Total flavonoids       | Verbascoside         |
|---------------------------------------------------|-----|----------------------|----------------------|----------------------|----------------------|---------------------|--------------------|------------------------|----------------------|
| Control                                           |     | 171.557 $\pm$ 12.516 | 445.713 $\pm$ 20.473 | 689.250 $\pm$ 24.371 | 424.741 $\pm$ 11.473 | 4.065 $\pm$ 0.927   | 4.620 $\pm$ 0.788  | 1739.947 $\pm$ 70.548  | 311.197 $\pm$ 40.548 |
| Phenylalanine [g/L]                               | 1.0 | 334.258 $\pm$ 18.753 | 575.217 $\pm$ 18.189 | 764.828 $\pm$ 50.536 | 827.073 $\pm$ 58.224 | 72.340 $\pm$ 13.252 | 17.224 $\pm$ 1.534 | 2590.941 $\pm$ 160.489 | 463.414 $\pm$ 60.489 |
|                                                   | 1.5 | 533.084 $\pm$ 21.941 | 698.826 $\pm$ 35.761 | 808.929 $\pm$ 64.103 | 935.389 $\pm$ 67.641 | 30.648 $\pm$ 9.536  | 34.814 $\pm$ 2.934 | 3041.690 $\pm$ 201.914 | 469.127 $\pm$ 91.914 |
|                                                   | 2.0 | 435.692 $\pm$ 32.555 | 590.140 $\pm$ 56.988 | 777.430 $\pm$ 65.114 | 905.162 $\pm$ 78.460 | 27.527 $\pm$ 2.972  | 30.873 $\pm$ 5.557 | 2766.825 $\pm$ 241.644 | 379.043 $\pm$ 41.644 |
|                                                   | 2.5 | 330.399 $\pm$ 27.374 | 449.045 $\pm$ 40.104 | 687.909 $\pm$ 37.977 | 885.060 $\pm$ 43.051 | 28.722 $\pm$ 5.183  | 32.812 $\pm$ 3.366 | 2413.946 $\pm$ 157.056 | 346.063 $\pm$ 57.056 |
| Tyrosine [g/L]                                    | 1.0 | 304.790 $\pm$ 13.156 | 431.531 $\pm$ 19.470 | 747.038 $\pm$ 15.450 | 407.018 $\pm$ 21.356 | 11.714 $\pm$ 2.075  | 29.693 $\pm$ 4.480 | 1931.784 $\pm$ 75.987  | 299.480 $\pm$ 75.987 |
|                                                   | 1.5 | 315.664 $\pm$ 28.169 | 442.068 $\pm$ 20.460 | 749.526 $\pm$ 15.489 | 388.409 $\pm$ 22.555 | 14.205 $\pm$ 1.264  | 18.889 $\pm$ 1.150 | 1928.760 $\pm$ 89.087  | 222.880 $\pm$ 49.087 |
|                                                   | 2.0 | 199.789 $\pm$ 16.897 | 196.472 $\pm$ 16.015 | 546.742 $\pm$ 9.012  | 310.049 $\pm$ 10.132 | 8.810 $\pm$ 0.188   | 22.051 $\pm$ 5.243 | 1283.913 $\pm$ 57.489  | 166.752 $\pm$ 57.489 |
|                                                   | 2.5 | 187.658 $\pm$ 13.839 | 255.948 $\pm$ 44.914 | 484.239 $\pm$ 66.116 | 220.618 $\pm$ 43.480 | 1.910 $\pm$ 0.079   | 25.742 $\pm$ 2.520 | 1176.114 $\pm$ 170.949 | 171.135 $\pm$ 17.949 |
| Methyl jasmonate $\mu$ M]                         | 10  | 351.450 $\pm$ 41.801 | 552.318 $\pm$ 23.506 | 649.821 $\pm$ 21.065 | 469.450 $\pm$ 23.055 | 12.588 $\pm$ 4.015  | 23.924 $\pm$ 1.454 | 2059.550 $\pm$ 114.897 | 381.523 $\pm$ 14.897 |
|                                                   | 50  | 298.456 $\pm$ 22.566 | 546.947 $\pm$ 26.662 | 676.638 $\pm$ 25.215 | 421.951 $\pm$ 56.217 | 25.840 $\pm$ 6.515  | 37.418 $\pm$ 2.325 | 2007.250 $\pm$ 139.498 | 133.698 $\pm$ 39.498 |
|                                                   | 100 | 221.490 $\pm$ 16.340 | 290.315 $\pm$ 17.305 | 149.515 $\pm$ 26.980 | 281.021 $\pm$ 18.593 | 1.098 $\pm$ 0.161   | 33.121 $\pm$ 5.111 | 976.560 $\pm$ 84.489   | 20.696 $\pm$ 8.489   |
| Phenylalanine [g/L] + methyl jasmonate 50 $\mu$ M | 1.0 | 301.654 $\pm$ 39.887 | 571.818 $\pm$ 59.332 | 709.401 $\pm$ 86.104 | 527.879 $\pm$ 60.244 | 12.122 $\pm$ 1.469  | 33.493 $\pm$ 2.452 | 2156.366 $\pm$ 249.489 | 141.078 $\pm$ 24.489 |
|                                                   | 1.5 | 527.640 $\pm$ 57.302 | 610.602 $\pm$ 78.309 | 745.436 $\pm$ 77.691 | 602.067 $\pm$ 85.539 | 17.999 $\pm$ 5.157  | 22.153 $\pm$ 3.881 | 2525.897 $\pm$ 307.879 | 160.597 $\pm$ 37.879 |
|                                                   | 2.0 | 487.657 $\pm$ 57.049 | 575.362 $\pm$ 69.760 | 608.223 $\pm$ 77.489 | 590.686 $\pm$ 66.980 | 15.461 $\pm$ 3.549  | 47.607 $\pm$ 4.670 | 2324.996 $\pm$ 279.498 | 142.153 $\pm$ 29.498 |
|                                                   | 2.5 | 302.749 $\pm$ 22.796 | 561.104 $\pm$ 42.587 | 602.598 $\pm$ 48.517 | 512.708 $\pm$ 49.738 | 10.038 $\pm$ 1.163  | 0.134 $\pm$ 0.098  | 1989.330 $\pm$ 164.899 | 120.270 $\pm$ 16.899 |
| Tyrosine [g/L] + methyl jasmonate 50 $\mu$ M      | 1.0 | 257.450 $\pm$ 8.652  | 507.194 $\pm$ 11.708 | 659.016 $\pm$ 10.974 | 442.457 $\pm$ 18.941 | 17.452 $\pm$ 1.758  | 22.427 $\pm$ 3.944 | 1905.997 $\pm$ 55.977  | 21.176 $\pm$ 5.977   |
|                                                   | 1.5 | 212.687 $\pm$ 13.469 | 344.997 $\pm$ 30.540 | 356.136 $\pm$ 65.189 | 381.224 $\pm$ 54.752 | 10.038 $\pm$ 0.915  | 27.505 $\pm$ 2.540 | 1332.587 $\pm$ 167.405 | 25.460 $\pm$ 7.405   |
|                                                   | 2.0 | 105.468 $\pm$ 17.619 | 140.292 $\pm$ 15.040 | 120.460 $\pm$ 39.044 | 360.621 $\pm$ 40.610 | 3.048 $\pm$ 0.652   | 0.372 $\pm$ 0.014  | 730.261 $\pm$ 112.979  | 17.156 $\pm$ 2.979   |
|                                                   | 2.5 | 88.973 $\pm$ 7.140   | 97.026 $\pm$ 21.534  | 121.561 $\pm$ 33.081 | 220.927 $\pm$ 35.617 | 0.527 $\pm$ 0.058   | 4.309 $\pm$ 1.052  | 533.322 $\pm$ 98.484   | 10.175 $\pm$ 2.484   |

**Table S2** Content of estimated metabolites in agitated microshoot in vitro cultures of *S. lateriflora* grown on LS medium supplemented with 1.0 mg/L BA and 1.0 NAA mg/L after administering different concentrations of biosynthetic precursors (phenylalanine and tyrosine) and elicitor (methyl jasmonate) collected 7 days after supplementation. Mean  $\pm$  SD [mg/100 g DW].

| Feeding/eliciting                                             |     | Baicalein            | Baicalin             | Wogonin              | Wogonoside            | Scutellarin         | Oroxylin A         | Total flavonoids       | Verbascoside         |
|---------------------------------------------------------------|-----|----------------------|----------------------|----------------------|-----------------------|---------------------|--------------------|------------------------|----------------------|
| Control                                                       |     | 162.414 $\pm$ 26.104 | 378.595 $\pm$ 26.606 | 666.088 $\pm$ 71.518 | 469.987 $\pm$ 59.996  | 2.539 $\pm$ 0.940   | 0.214 $\pm$ 0.023  | 1679.837 $\pm$ 185.187 | 267.327 $\pm$ 15.187 |
| Phenylalanine<br>[g/L]                                        | 1.0 | 421.423 $\pm$ 34.919 | 686.268 $\pm$ 45.593 | 825.584 $\pm$ 78.669 | 928.457 $\pm$ 112.633 | 64.221 $\pm$ 17.094 | 38.498 $\pm$ 8.280 | 2964.451 $\pm$ 297.188 | 398.597 $\pm$ 27.188 |
|                                                               | 1.5 | 614.788 $\pm$ 38.279 | 928.948 $\pm$ 55.794 | 964.501 $\pm$ 49.668 | 1138.451 $\pm$ 64.939 | 68.295 $\pm$ 4.980  | 49.898 $\pm$ 3.828 | 3764.881 $\pm$ 217.489 | 474.795 $\pm$ 27.489 |
|                                                               | 2.0 | 516.970 $\pm$ 25.841 | 988.086 $\pm$ 56.083 | 875.558 $\pm$ 43.162 | 1148.771 $\pm$ 50.697 | 60.817 $\pm$ 6.254  | 53.653 $\pm$ 4.450 | 3643.854 $\pm$ 186.487 | 329.667 $\pm$ 36.487 |
|                                                               | 2.5 | 596.308 $\pm$ 23.850 | 760.204 $\pm$ 11.426 | 727.718 $\pm$ 21.986 | 910.827 $\pm$ 13.158  | 62.108 $\pm$ 7.751  | 30.143 $\pm$ 6.616 | 3087.308 $\pm$ 84.786  | 327.734 $\pm$ 34.786 |
| Tyrosine<br>[g/L]                                             | 1.0 | 157.460 $\pm$ 18.653 | 419.209 $\pm$ 21.780 | 655.544 $\pm$ 30.779 | 516.879 $\pm$ 56.240  | 9.321 $\pm$ 1.797   | 41.057 $\pm$ 8.250 | 1799.470 $\pm$ 137.499 | 263.961 $\pm$ 37.499 |
|                                                               | 1.5 | 162.457 $\pm$ 49.878 | 284.688 $\pm$ 45.369 | 270.264 $\pm$ 79.089 | 485.827 $\pm$ 131.150 | 3.751 $\pm$ 0.678   | 41.758 $\pm$ 1.730 | 1248.745 $\pm$ 307.894 | 210.926 $\pm$ 37.894 |
|                                                               | 2.0 | 113.764 $\pm$ 23.568 | 113.103 $\pm$ 16.217 | 233.897 $\pm$ 45.127 | 300.340 $\pm$ 45.344  | 0.084 $\pm$ 0.007   | 21.818 $\pm$ 1.459 | 783.007 $\pm$ 131.722  | 145.963 $\pm$ 31.722 |
|                                                               | 2.5 | 98.154 $\pm$ 22.671  | 111.861 $\pm$ 35.212 | 232.868 $\pm$ 68.849 | 250.713 $\pm$ 94.841  | 0.041 $\pm$ 0.009   | 19.392 $\pm$ 6.389 | 713.028 $\pm$ 227.97   | 128.312 $\pm$ 27.970 |
| Methyl<br>jasmonate<br>[ $\mu$ M]                             | 10  | 254.440 $\pm$ 27.292 | 474.399 $\pm$ 49.675 | 657.090 $\pm$ 67.793 | 328.520 $\pm$ 43.090  | 5.292 $\pm$ 1.872   | 43.708 $\pm$ 3.768 | 1763.448 $\pm$ 193.489 | 121.553 $\pm$ 19.489 |
|                                                               | 50  | 300.486 $\pm$ 40.901 | 427.820 $\pm$ 20.453 | 676.857 $\pm$ 55.040 | 365.481 $\pm$ 17.298  | 10.087 $\pm$ 2.591  | 34.146 $\pm$ 1.175 | 1814.878 $\pm$ 137.456 | 52.582 $\pm$ 13.456  |
|                                                               | 100 | 190.564 $\pm$ 37.074 | 165.356 $\pm$ 28.380 | 183.494 $\pm$ 75.055 | 218.359 $\pm$ 85.208  | 0.040 $\pm$ 0.007   | 4.444 $\pm$ 0.632  | 762.256 $\pm$ 226.354  | 41.891 $\pm$ 6.354   |
| Phenylalanine<br>[g/L] +<br>methyl<br>jasmonate<br>50 $\mu$ M | 1.0 | 325.480 $\pm$ 21.628 | 543.161 $\pm$ 21.289 | 698.489 $\pm$ 19.103 | 601.435 $\pm$ 28.710  | 18.946 $\pm$ 4.985  | 24.858 $\pm$ 1.442 | 2212.369 $\pm$ 97.156  | 170.694 $\pm$ 17.156 |
|                                                               | 1.5 | 541.608 $\pm$ 36.215 | 630.484 $\pm$ 17.532 | 782.986 $\pm$ 29.100 | 620.747 $\pm$ 30.154  | 18.046 $\pm$ 3.460  | 23.002 $\pm$ 4.107 | 2616.874 $\pm$ 120.568 | 142.323 $\pm$ 12.568 |
|                                                               | 2.0 | 502.489 $\pm$ 58.489 | 623.827 $\pm$ 75.770 | 657.050 $\pm$ 90.489 | 590.761 $\pm$ 82.540  | 15.346 $\pm$ 2.057  | 25.006 $\pm$ 7.145 | 2414.479 $\pm$ 316.489 | 28.368 $\pm$ 6.489   |
|                                                               | 2.5 | 365.978 $\pm$ 34.335 | 525.029 $\pm$ 57.465 | 547.899 $\pm$ 74.527 | 416.988 $\pm$ 86.413  | 10.181 $\pm$ 1.152  | 16.730 $\pm$ 2.263 | 1882.805 $\pm$ 256.156 | 117.389 $\pm$ 25.156 |
| Tyrosine<br>[g/L] +<br>methyl<br>jasmonate<br>50 $\mu$ M      | 1.0 | 264.457 $\pm$ 31.590 | 411.619 $\pm$ 41.777 | 599.387 $\pm$ 51.315 | 479.433 $\pm$ 51.441  | 9.041 $\pm$ 0.800   | 14.562 $\pm$ 2.246 | 1778.499 $\pm$ 179.168 | 24.220 $\pm$ 1.168   |
|                                                               | 1.5 | 170.544 $\pm$ 20.489 | 390.586 $\pm$ 23.498 | 415.977 $\pm$ 44.241 | 403.332 $\pm$ 45.150  | 10.042 $\pm$ 1.025  | 8.812 $\pm$ 0.489  | 1399.293 $\pm$ 134.892 | 44.068 $\pm$ 4.892   |
|                                                               | 2.0 | 120.560 $\pm$ 14.679 | 114.740 $\pm$ 17.550 | 330.750 $\pm$ 35.804 | 321.291 $\pm$ 43.159  | 3.693 $\pm$ 0.054   | 6.562 $\pm$ 1.250  | 897.595 $\pm$ 112.496  | 38.745 $\pm$ 12.496  |
|                                                               | 2.5 | 74.979 $\pm$ 9.588   | 64.506 $\pm$ 8.850   | 280.974 $\pm$ 24.238 | 204.285 $\pm$ 35.218  | 5.038 $\pm$ 0.727   | 7.983 $\pm$ 0.843  | 637.766 $\pm$ 89.464   | 43.942 $\pm$ 8.464   |
