# Supplementary material for: Antioxidant Potential and Enhancement of Bioactive Metabolite Production in In Vitro Cultures of Scutellaria lateriflora L. by Biotechnological Methods
Source: MDPI journal article supplement (doi:10.3390/molecules27031140), 2022-02-08
Supplement: s1 [file s1]

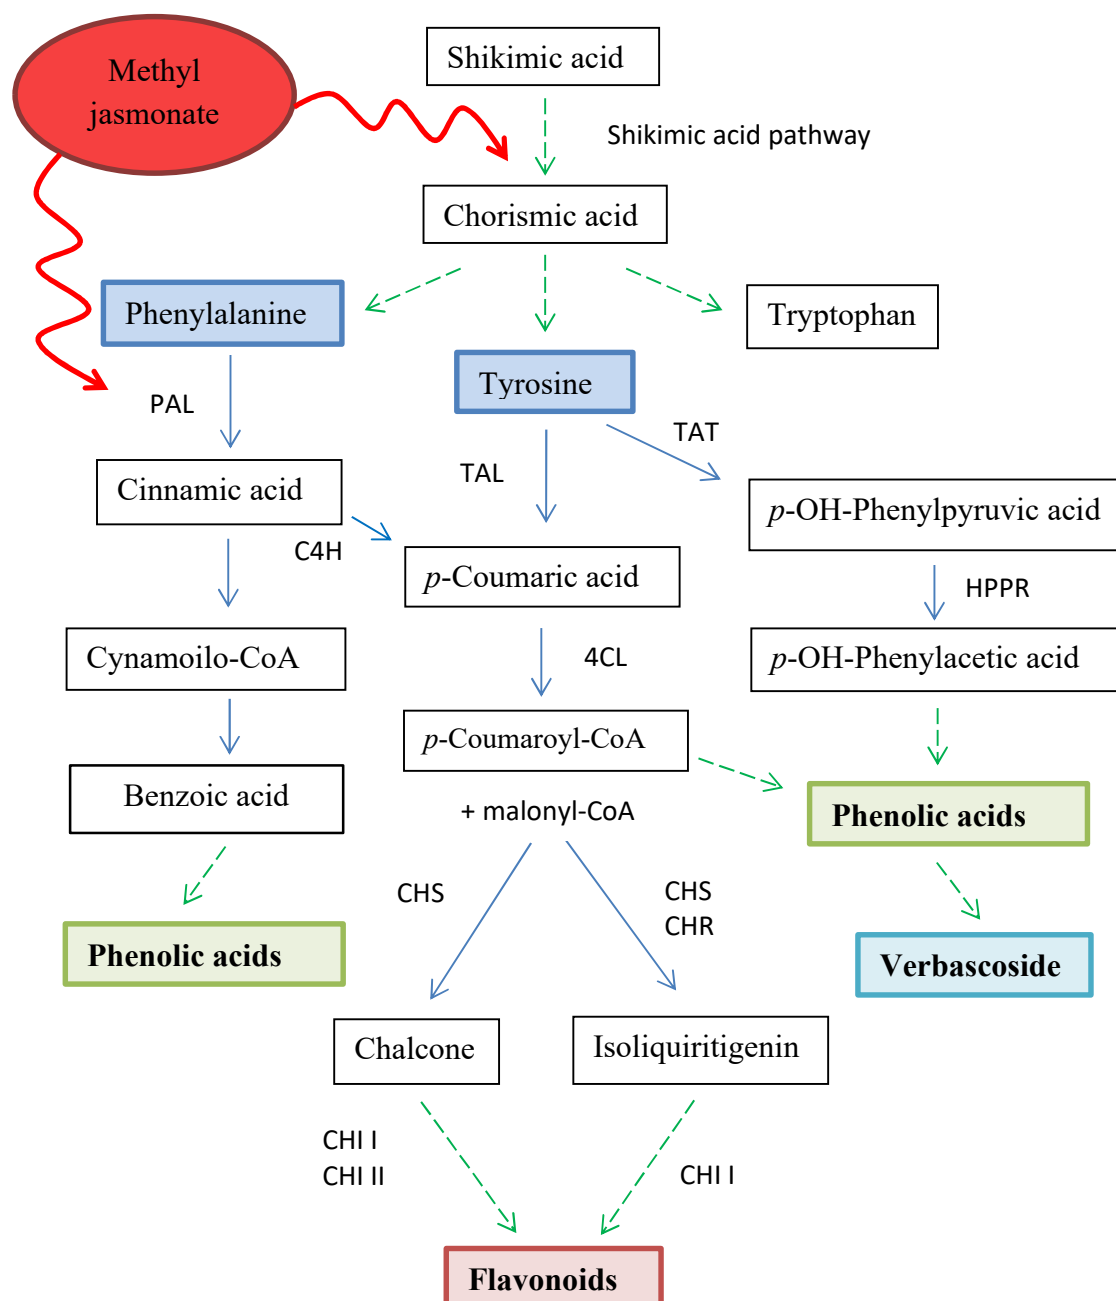

Figure S1. Phenolic compounds biosynthesis pathways.

Abbreviations:

C4H - cinnamate-4-hydroxylase; CHI - chalcone isomerase; CHR – chalcone reductase; CHS - chalcone synthase; 4CL - 4-coumaroyl:CoA-ligase; HPPR - 4-hydroxyphenylpyruvate reductase; PAL - phenylalanine ammonia-lyase; TAL - tyrosine ammonia-lyase; TAT – tyrosine aminotransferase;
