# Supplementary figures and images for: Antioxidant Potential and Enhancement of Bioactive Metabolite Production in In Vitro Cultures of Scutellaria lateriflora L. by Biotechnological Methods
Source: MDPI journal article supplement (doi:10.3390/molecules27031140), 2022-02-08

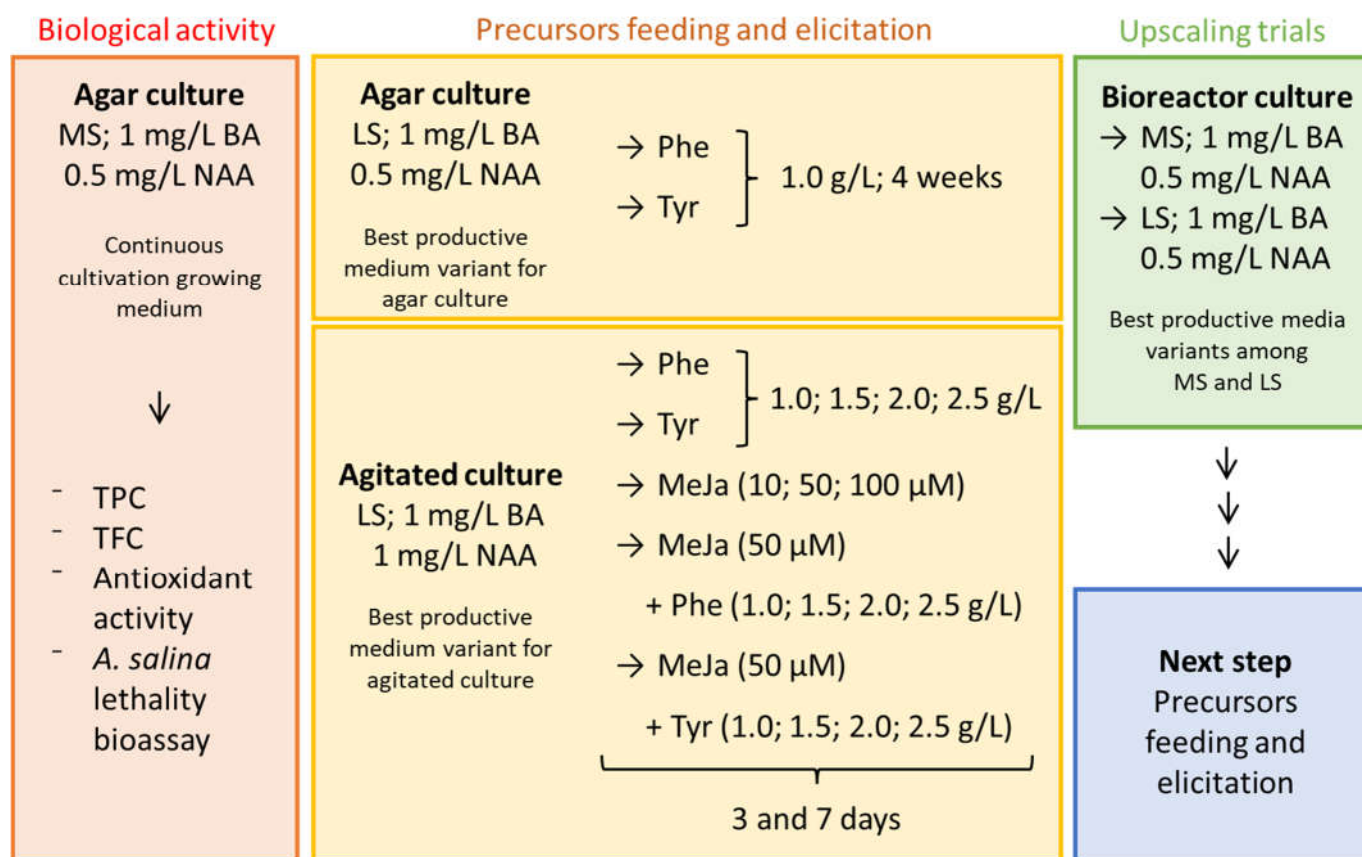

Figure S2. *Scutellaria lateriflora* microshoot cultures. Diagram of the experimental process.

Supplement: s1 [file s1]
